# Supplementary material for: In vivo single-molecule imaging of syntaxin1A reveals polyphosphoinositide- and activity-dependent trapping in presynaptic nanoclusters
Source: PubMed Central journal article supplement (PMC5171881; doi:10.1038/ncomms13660), 2016-12-16
Supplement: ncomms13660-s1.pdf [file ncomms13660-s1.pdf]

Supplementary Figure 1

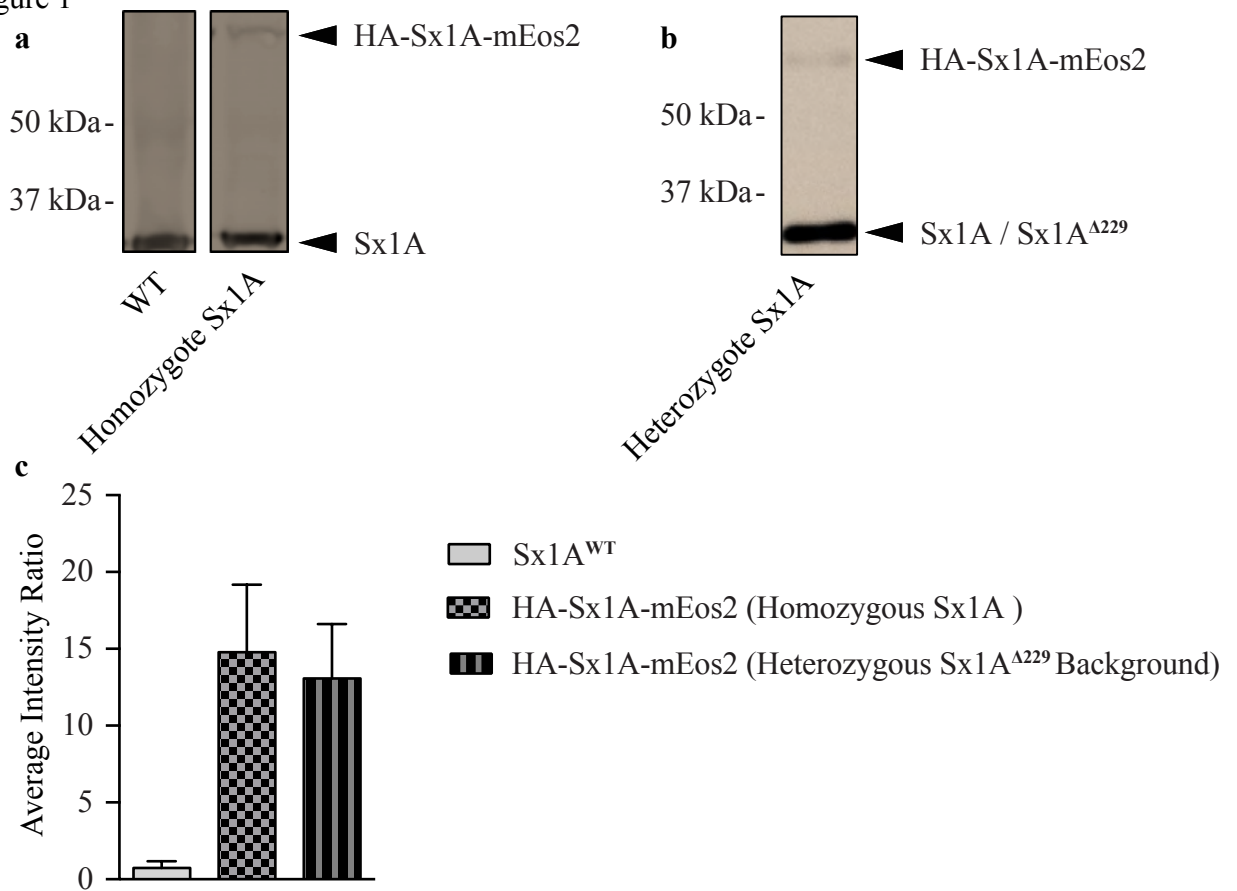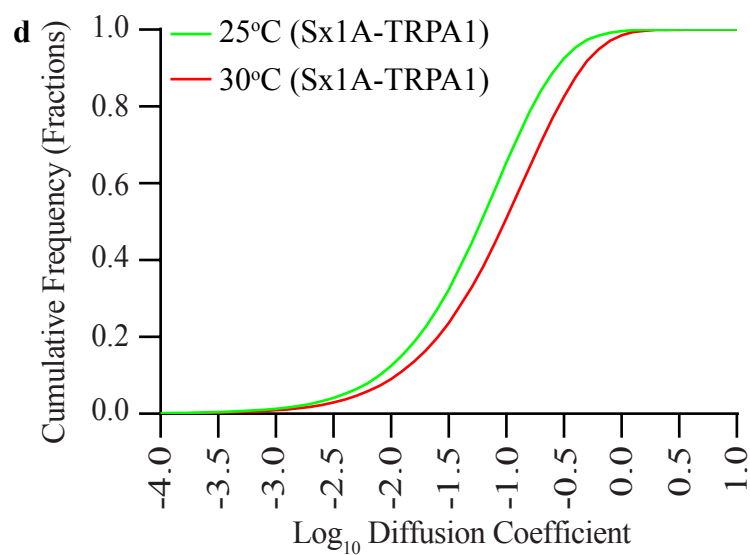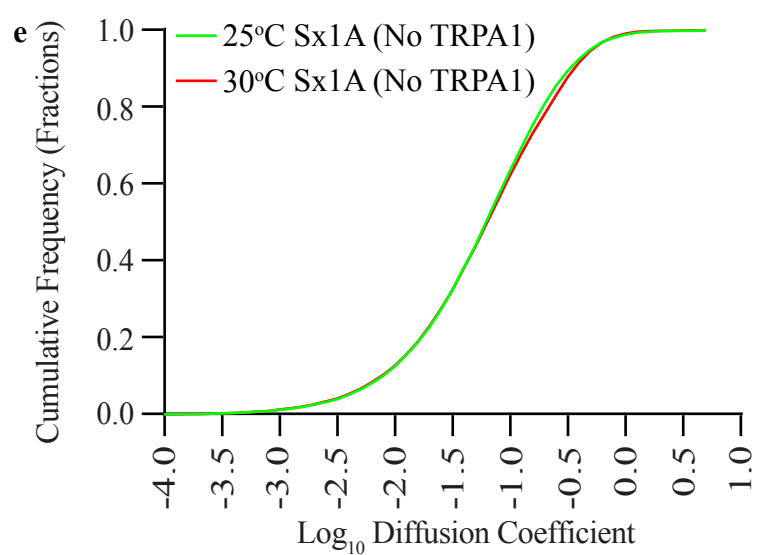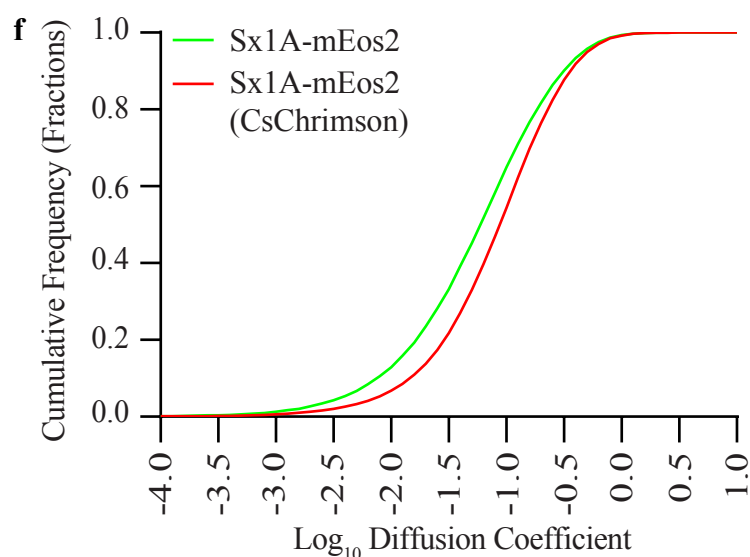

**Supplementary Figure 1. Sx1A-mEos2 expression and cumulative frequency distribution.** (a-c) Sx1A-mEos2 expression was analyzed by western blot in larvae with full endogenous Sx1A expression and in larvae with heterozygous expression of Sx1A<sup>A229</sup>. Sx1A-mEos2 expression was much lower when compared to endogenous Sx1A. Average intensity measurement showed that Sx1A-mEos2 expression was also low in the heterozygous null Sx1A mutant (14.8±4.0 to 13.1±3.5). (d) Cumulative frequency distribution of diffusion coefficients of Sx1A-mEos2 upon dTRPA1 temperature activation from 25°C to 30°C; P<0.0001, Kolmogorov-Smirnov test. (e) Cumulative frequency distribution of diffusion coefficients showed temperature elevation from 25°C to 30°C does not alter Sx1A-mEos2 mobility; P>0.05, Kolmogorov-Smirnov test. (f) Cumulative frequency distribution of diffusion coefficient of Sx1A-mEos2 upon CsChrimson-retinal-mediated synaptic transmission showed increased mobility; P<0.0001, Kolmogorov-Smirnov test. Mean±SEM are plotted.

Supplementary Figure 2

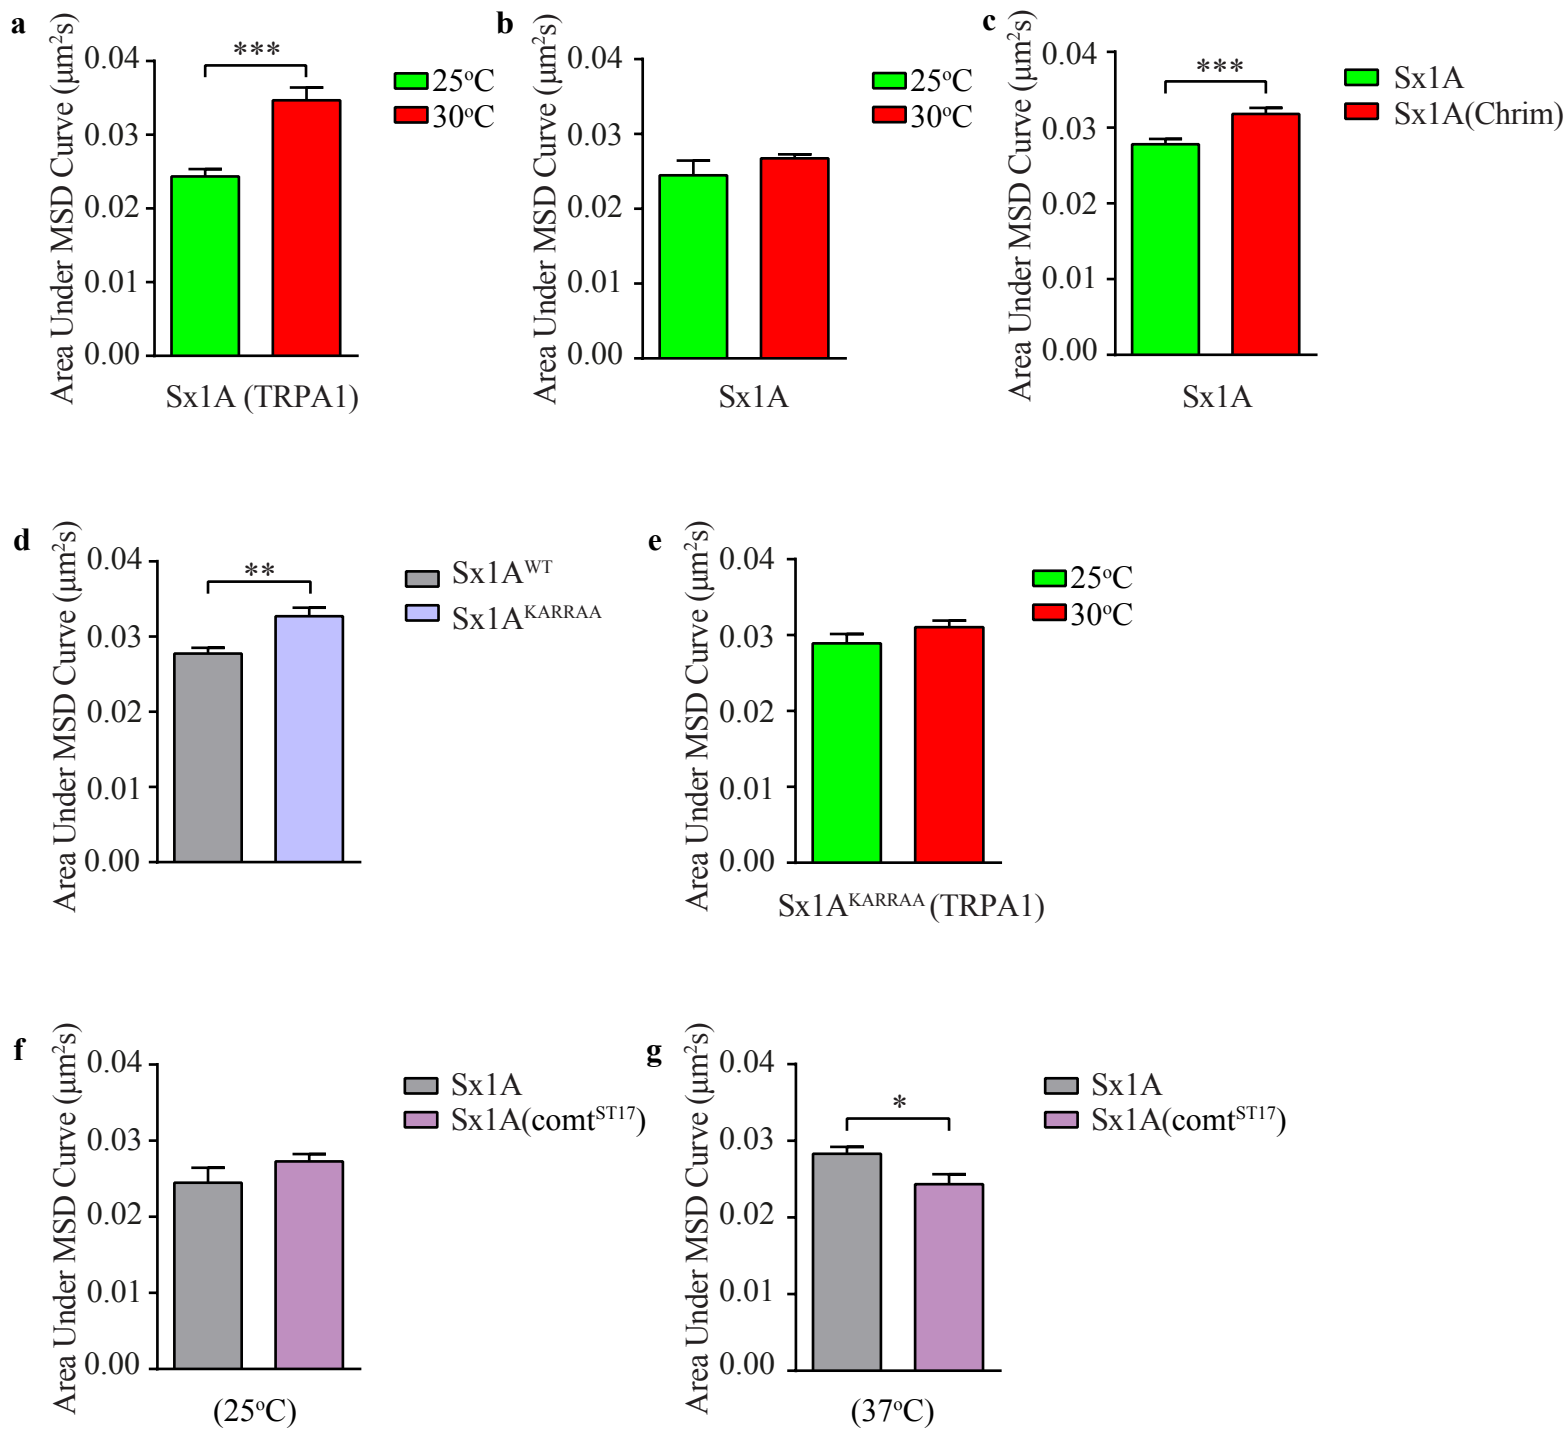

**Supplementary Figure 2. Area under the mean square displacement curves.** (a-g) Shows the area under the MSD curve for Sx1A mobility in each of the different conditions. Statistical tests were performed using the student's t test (two-tailed distribution, unpaired). \*P<0.05, \*\*, P<0.01, \*\*\*, P<0.001. Mean±SEM are plotted.

Supplementary Figure 3

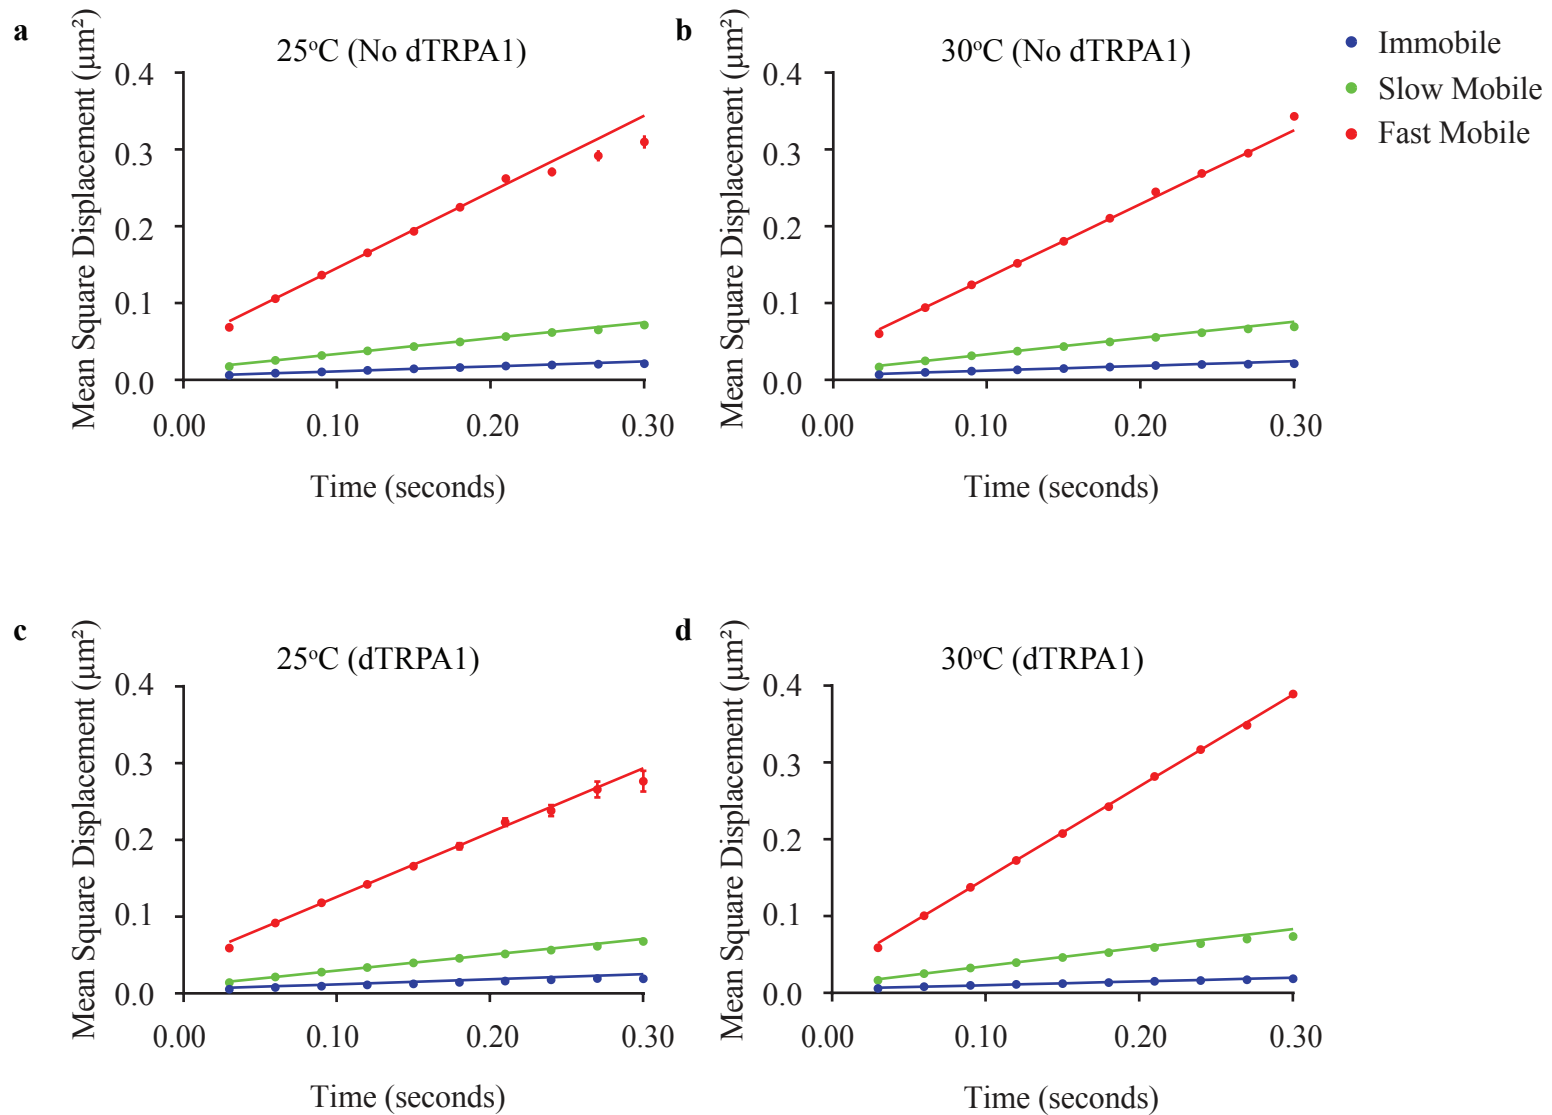

**Supplementary Figure 3. Mean square displacement analysis of each diffusive state.** Mean square displacement of trajectories (symbols) that did not undergo stochastic switching from (a) NMJ chains without dTRPA1 expression at 25°C (n = 2138 (blue), 4140 (green), 8927 (red) trajectories, 11 NMJ chains), (b) NMJ chains without dTRPA1 expression at 30°C (n = 1932 (blue), 4475 (green), 3867 (red) trajectories, 10 NMJ chains), (c) NMJ chains with dTRPA1 expression at 25°C (n = 2635 (blue), 4214 (green), 2341 (red) trajectories, 12 NMJ chains), and (d) NMJ chains with dTRPA1 expression at 30°C (n = 2695 (blue), 7994 (green), 19000 (red) trajectories, 11 NMJ chains). Error bars indicate SEM. Solid lines are a linear fit to the second, third and fourth time lags.

## Supplementary Figure 4

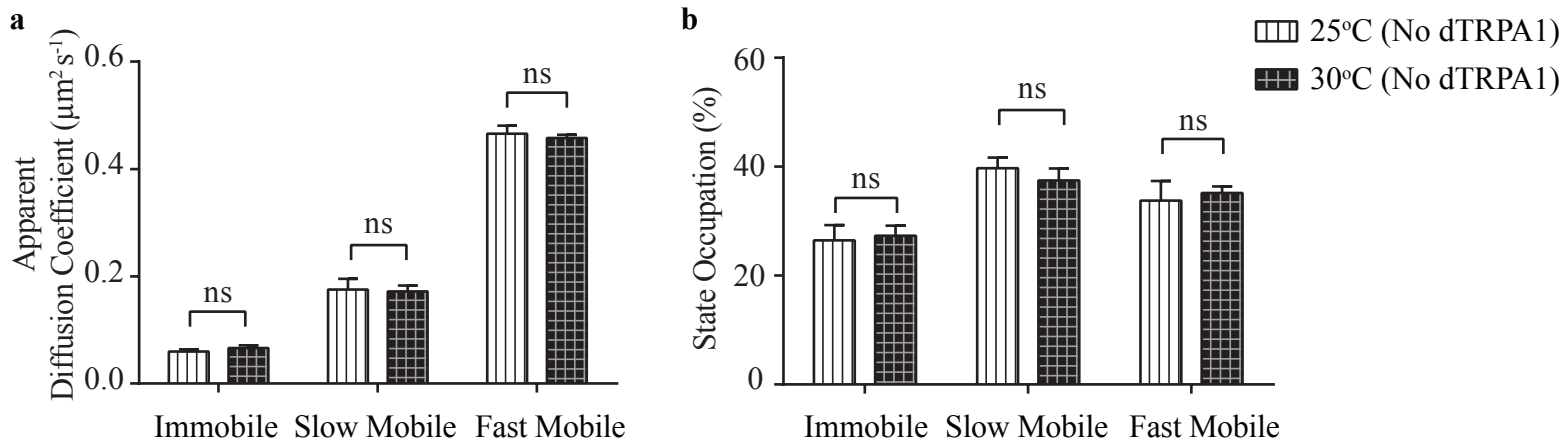

**Supplementary Figure 4. Temperature elevation did not affect hidden Markov model parameters in the absence of dTRPA1 expression.** (a) Apparent diffusion coefficients and (b) state occupations inferred by analysing trajectories from NMJ chains without expression of dTRPA1 at 25°C and 30°C. Statistical tests were performed using Mann-Whitney U test (ns indicates  $P > 0.05$ ). Mean  $\pm$  SEM are plotted.

Supplementary Figure 5

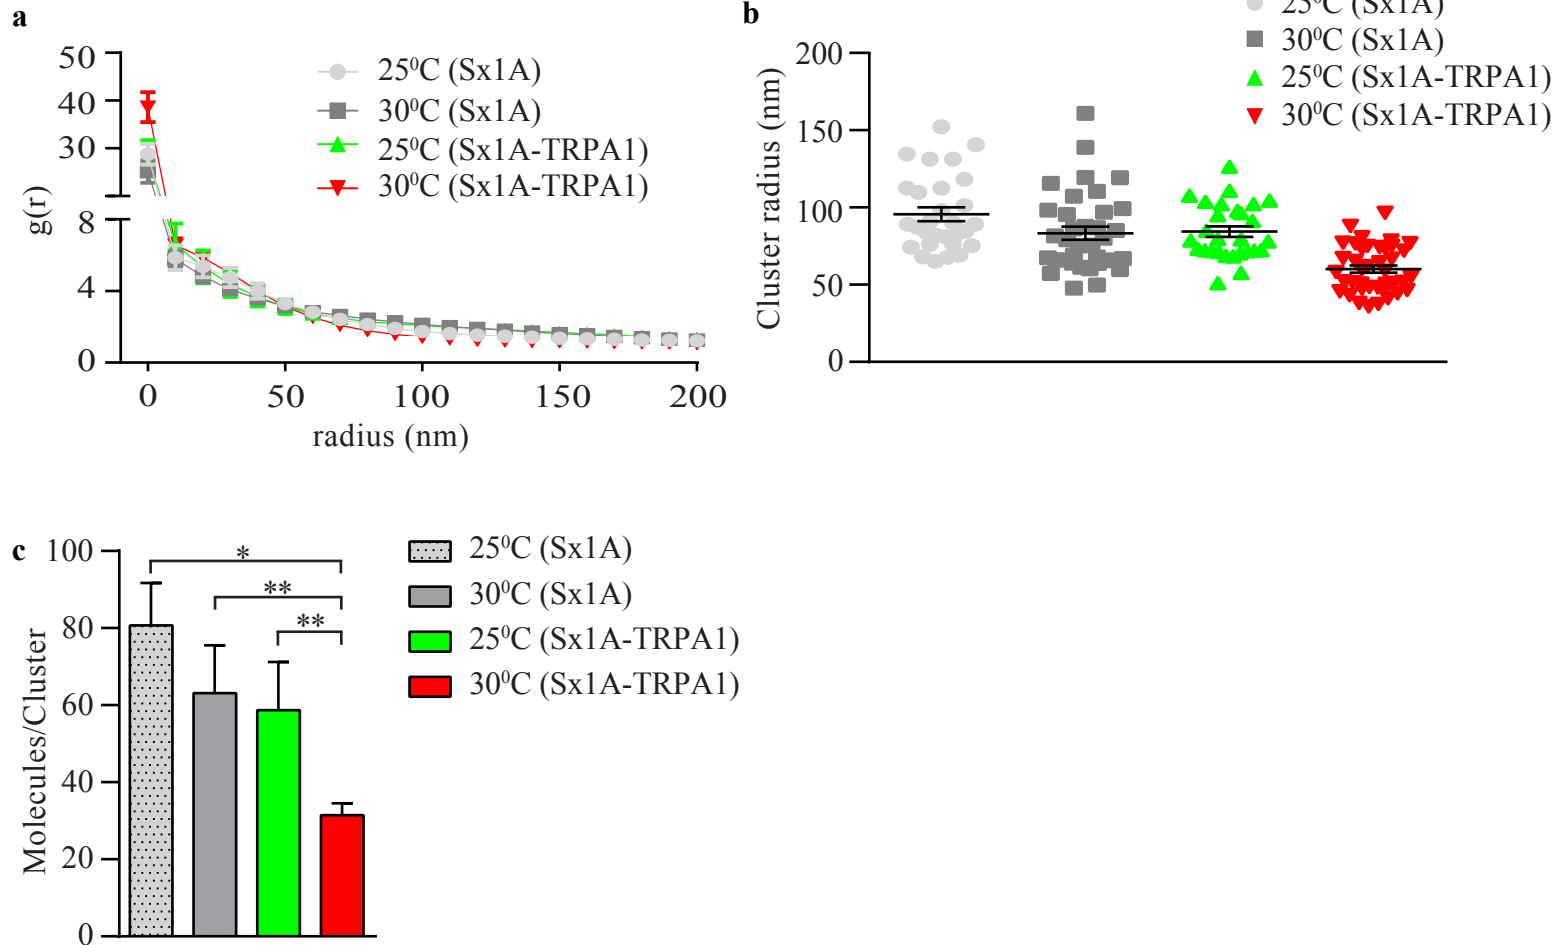

**Supplementary Figure 5. Thermogenetic-mediated increase in presynaptic transmission decreased Sx1A-mEos2 molecules per cluster.** (a) Average of auto-correlation functions of Sx1A-mEos2 (in the presence or absence of dTRPA1 expression) upon temperature increase from 25°C to 30°C. (b) Cluster radius scatter plot distribution of Sx1A-mEos2 upon elevation of presynaptic activity. (c) The average number of molecules per cluster of Sx1A-mEos2 significantly decreased from  $58.7 \pm 12.5$  to  $31.4 \pm 3.6$  with a dTRPA1-mediated increase in synaptic activity. Temperature did not significantly alter the Sx1A-mEos2 molecules per cluster (25°C,  $80.7 \pm 10.9$  and 30°C,  $63.1 \pm 12.4$ ). Statistical tests were performed using student's t test (two-tailed distribution, unpaired). \*,  $P < 0.05$ , \*\*,  $P < 0.01$ , \*\*\*,  $P < 0.001$ . Mean  $\pm$  SEM are plotted.

Supplementary Figure 6

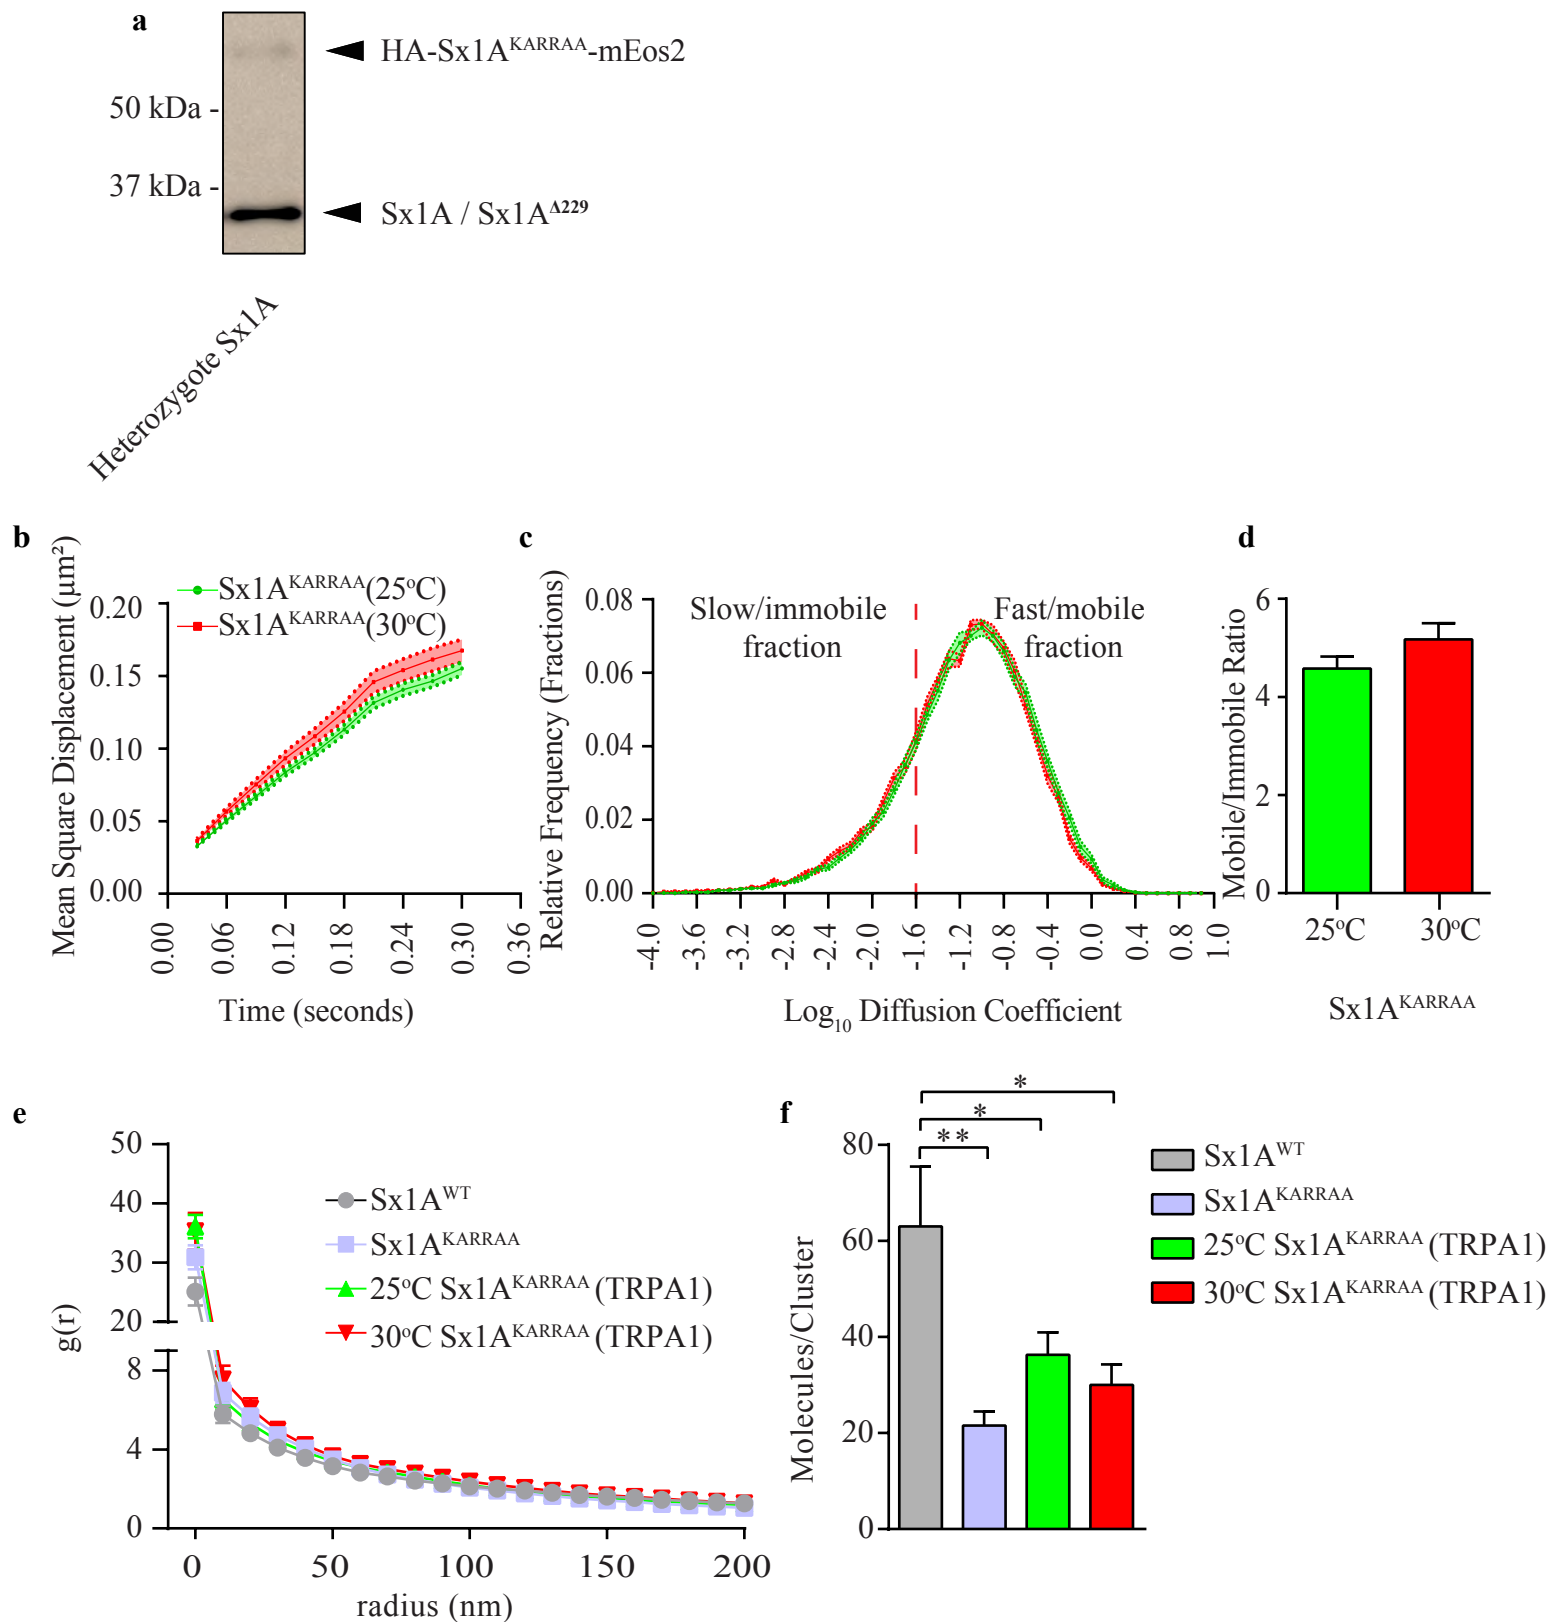

**Supplementary Figure 6. Sx1A<sup>KARRAA</sup>-mEos2 expression, mobility and molecules per cluster.**

(a) Sx1A<sup>KARRAA</sup>-mEos2 expressed in the Sx1A-null mutant background with heterozygous expression. (b-d) MSD and diffusion coefficient distribution. Note that a change in temperature from 25°C to 30°C did not alter Sx1A<sup>KARRAA</sup>-mEos2 mobility. The mobile to immobile ratio was also not altered (25°C, 4.6±0.2 to 30°C, 5.2±0.3, n=15 NMJ chains for Sx1A<sup>KARRAA</sup>-mEos2 at 25°C and 17 NMJ chains for Sx1A<sup>KARRAA</sup>-mEos2 at 30°C; average of ~1,600 trajectories per NMJ chain). (e) Average of auto-correlation functions of Sx1A<sup>KARRAA</sup>-mEos2 upon a dTRPA1-mediated increase in synaptic activity. (f) The average number of molecules per cluster of Sx1A<sup>KARRAA</sup>-mEos2 was significantly lower (21.5±2.9) compared with Sx1A-mEos2 (63.1±12.4). The thermogenetic-mediated increase in synaptic activity did not alter the average number of Sx1A<sup>KARRAA</sup>-mEos2 molecules per cluster (36.3±4.7 at 25°C to 30.0±4.2 at 30°C). Statistical tests were performed using student's t test (two-tailed distribution, unpaired). \*, P<0.05, \*\*, P<0.01, \*\*\*, P<0.001. Mean±SEM are plotted.

Supplementary Figure 7

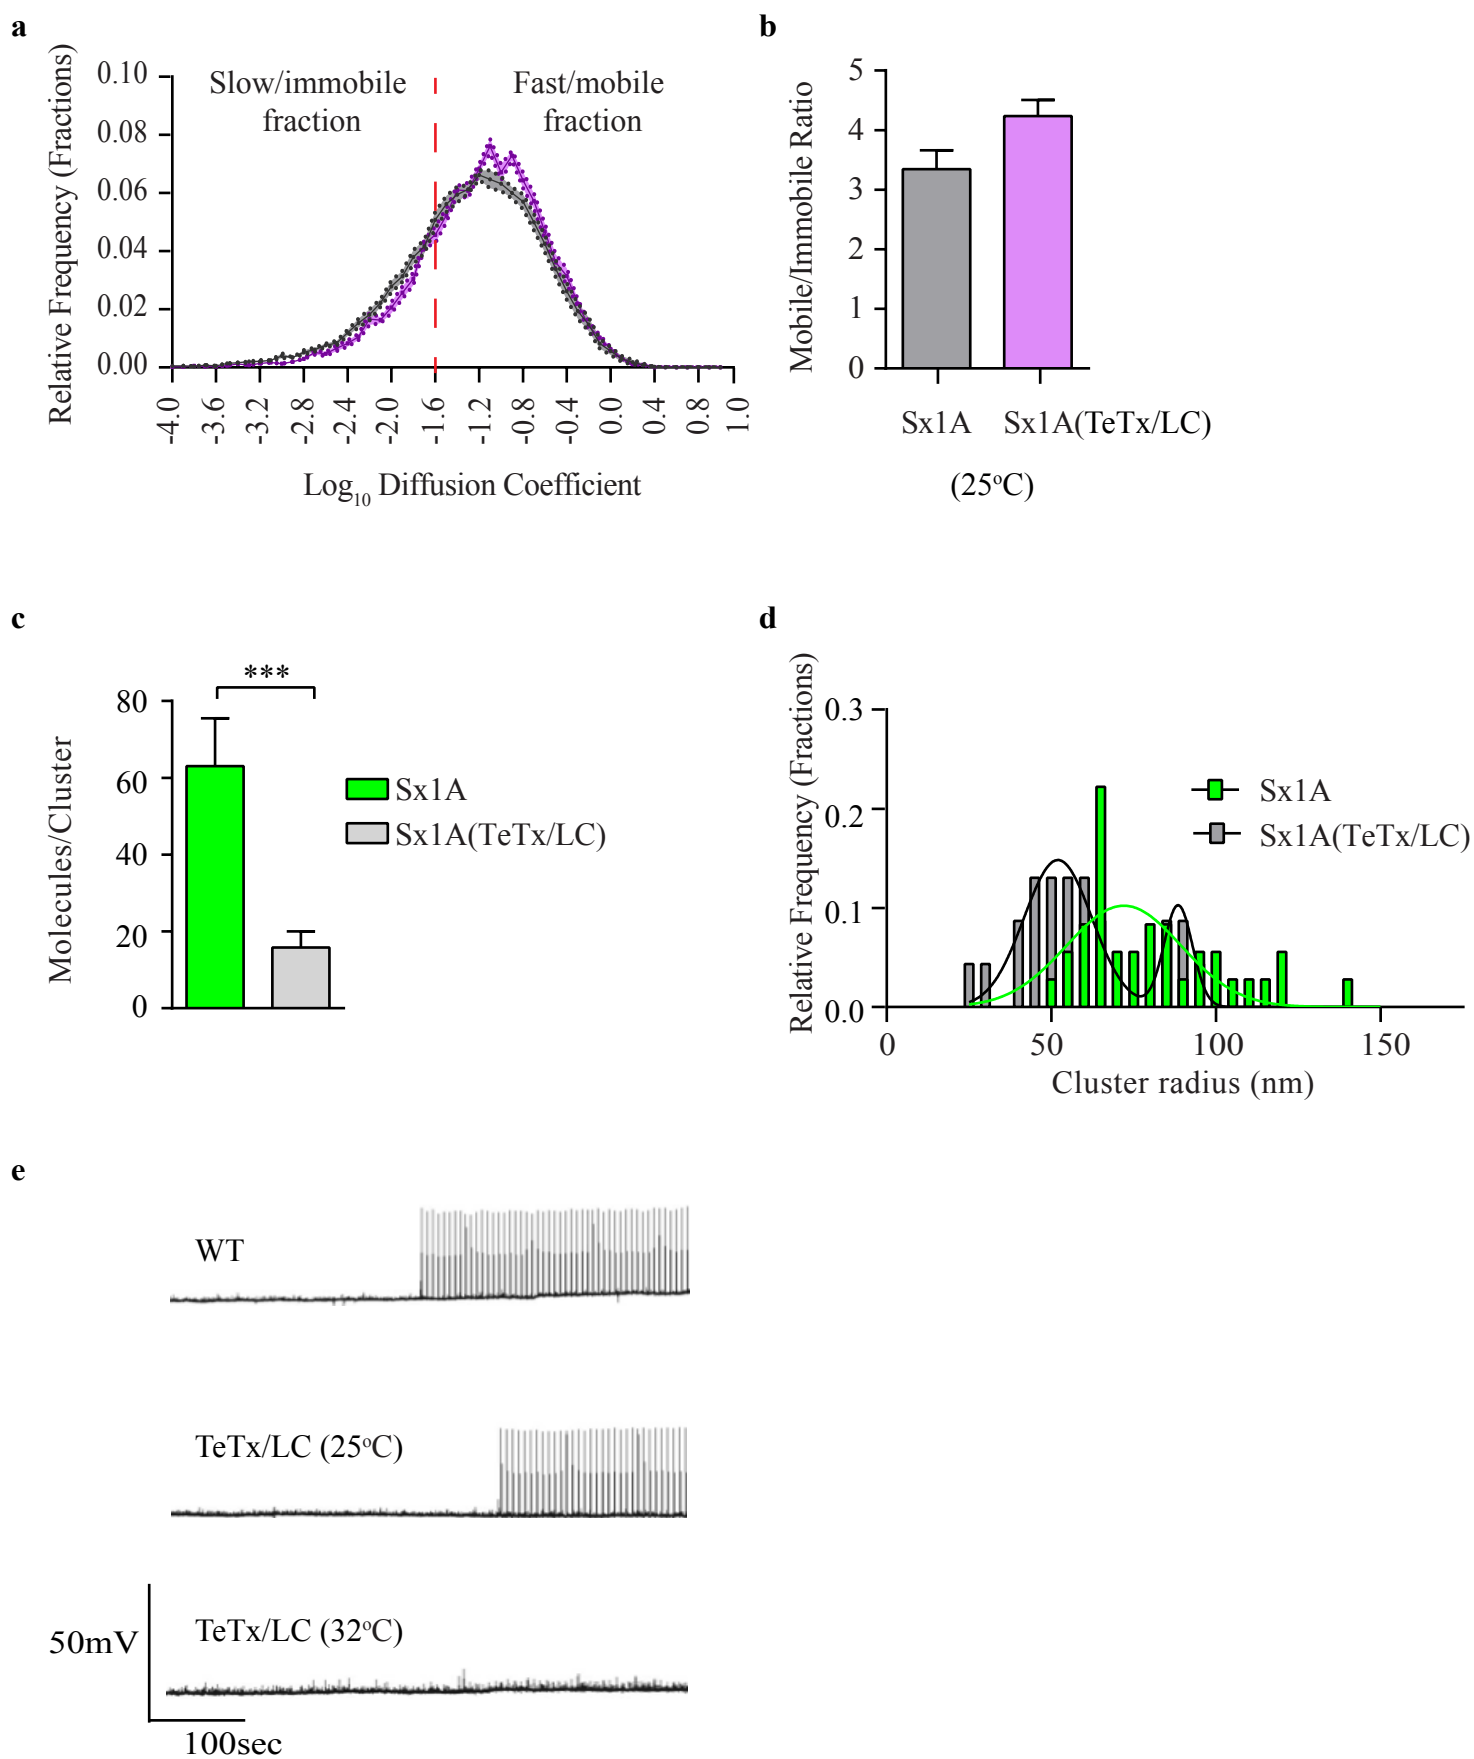

**Supplementary Figure 7. Change in Sx1A-mEos2 molecules per cluster and cluster size distribution upon TeTx/LC expression.** (a-b) The diffusion coefficient distribution of Sx1A-mEos2 was not altered 25°C when tubulin Gal80 suppressed the expression of TeTx/LC. The mobile to immobile ratio of Sx1A-mEos2 was  $3.3 \pm 0.3$  and  $4.2 \pm 0.3$  with TeTx/LC suppressed ( $n=15$  NMJ chains for Sx1A-mEos2 only and 10 NMJ chains for Sx1A-mEos2 with TeTx/LC suppressed; average of  $\sim 1,900$  trajectories per NMJ chain). (c) TeTx/LC expression significantly decreased the average number of molecules per Sx1A-mEos2 cluster from  $63.1 \pm 12.4$  to  $15.8 \pm 4.2$ . Statistical tests were performed using the Mann-Whitney U test  $***P < 0.001$ . (d) Cluster size peak distribution for Sx1A-mEos2 was  $72.0 \pm 5.40$  and changed to a two peak distribution at  $52.0 \pm 0.9$  and  $88.5 \pm 0.9$  upon TeTx/LC expression. (f) Excitatory junction potentials in wild-type *Drosophila* larvae, Sx1A-mEos2 transgenic larvae with tubulin Gal80 suppression of TeTx/LC (25°C) and Sx1A-mEos2 larvae with TeTx/LC expression (32°C). Mean  $\pm$  SEM are plotted.

**a**

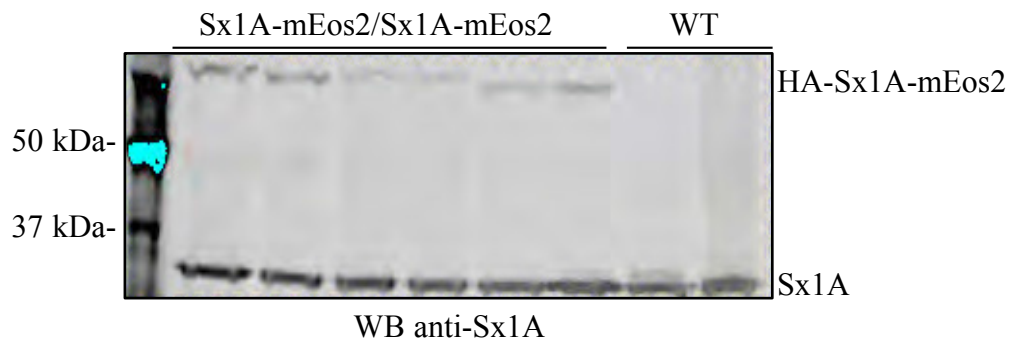

**b**

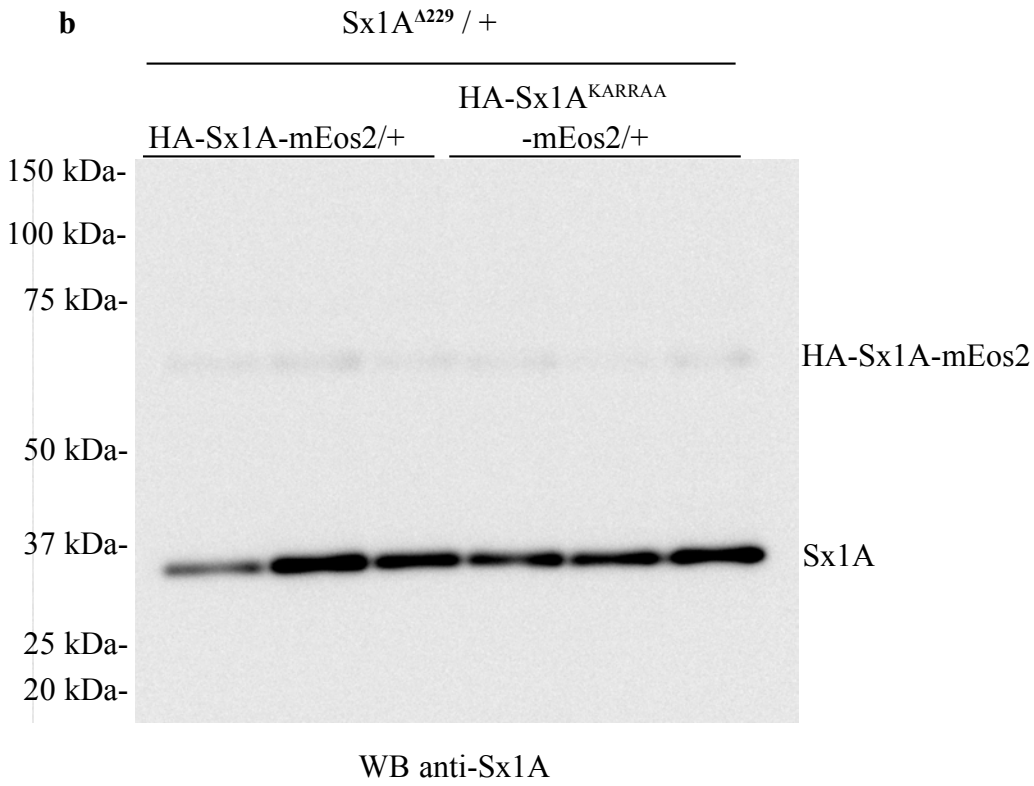

**c**

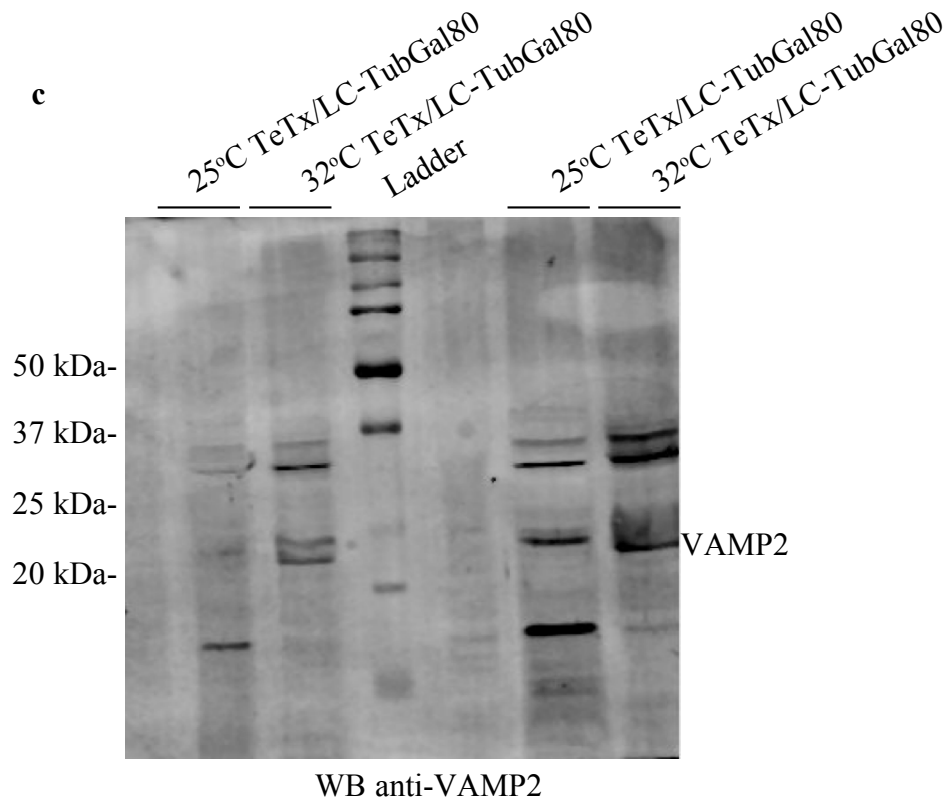

**Supplementary Figure 8. Uncropped scans of western blots.** (a) Sx1A-mEos2 expression was analysed by western blot in larvae with full endogenous Sx1A expression. (b) Sx1A-mEos2 and Sx1A<sup>KARRAA</sup>-mEos2 expression was analysed by western blot in larvae with heterozygous expression of Sx1A<sup>A229</sup>. (c) Cleavage of VAMP2 by temperature dependent expression of TeTx/LC was analysed by western blot.



**Supplementary Table 1. Primers used in making Sx1A-mEos2 and Sx1A<sup>KARRAA</sup>-mEos2 construct.** They include the forward and reverse sequences for Sx1A and mEos2, mEos2 check, as well as the sequence for the amino acid linking Sx1A to mEos2.

| <b>Primer</b>        | <b>Sequence</b>                                                  |
|----------------------|------------------------------------------------------------------|
| F-Sx1A-mEos2         | GGGCATCTTAGCGGCCTCATATGTTAGCAGTTAT<br>TTCATGATGAGTGCGATTAAGCCAG  |
| R-Sx1A-mEos2         | GGAGTGAATGTGGCGTGTAAGTAATTGCATTCGA<br>GATTAATCGTCTGGCATTGTCAGGC  |
| F-mEos2 Genomic      | TGCTGTTGCTCATTCTGGATTGCCTGACAATGCCA<br>GACGATAAATCTCGAATGCAATTAC |
| R-mEos2 Genomic      | GTGAGAAATGAAATCATAGCTGAAACCGAAATC<br>CATTAATTTCTGTAACTTTTCTGGC   |
| F-mEos2 Check        | TGAAGGAAATGCCCATACC                                              |
| R-mEos2 Check        | GAGACTCTTGCTTACTAACC                                             |
| 12 Amino acid Linker | GAG GTA CCG CGG GCC CGG GAT CCA CCG GTC<br>GCC ACC               |

!
